# Supplementary material
Source: MDPI journal article supplement (https://www.mdpi.com/2071-1050/13/13/7481)
Supplement: s1 [file s1]

Table S1 supplemental. Proposed allocation criteria

| Allocation criteria                                                                                                                 | Objective Function                                                                                                                                                                                                                                                                                                                                                                                                                                                                                                                                                                                                                                                                                                                                                                                                                                                | Sensitive receptors      | Note                                                                                                                                                                                                                                                                                                                                             |
|-------------------------------------------------------------------------------------------------------------------------------------|-------------------------------------------------------------------------------------------------------------------------------------------------------------------------------------------------------------------------------------------------------------------------------------------------------------------------------------------------------------------------------------------------------------------------------------------------------------------------------------------------------------------------------------------------------------------------------------------------------------------------------------------------------------------------------------------------------------------------------------------------------------------------------------------------------------------------------------------------------------------|--------------------------|--------------------------------------------------------------------------------------------------------------------------------------------------------------------------------------------------------------------------------------------------------------------------------------------------------------------------------------------------|
| Individual exposition to the $i$ -th pollutant in the $k$ -th cell [ $\mu\text{g} \cdot \text{m}^{-3} \cdot \text{h}$ ]             | <p><b>Exposition<sub>i,k</sub></b> = max (<math>C_{i,k} \times t</math>)</p> <p>Where<br/> <math>C_{i,k}</math>: Concentration of the <math>i</math>-th pollutant [<math>\mu\text{g} \cdot \text{m}^{-3}</math>] in the <math>k</math>-th cell<br/> <math>t</math>: outdoor exposure time [h]*</p> <p>* Population outdoor exposure time: summer 3h 40'; winter 1h 50'. Vegetation outdoor exposure time: summer and winter 24h (ISPRA, 2010)</p>                                                                                                                                                                                                                                                                                                                                                                                                                 | Population<br>Vegetation | Quantifies the exposure of an individual to a specific outdoor pollutant (Kao and Hsieh, 2006; Langstaff et al., 1967; Larsen et al., 1967; Negri and Sozzi, 1988; Noll et al., 1977; Tseng and Chang, 2001)                                                                                                                                     |
| Overall exposition to the $i$ -th pollutant in the $k$ -th cell [ $\mu\text{g} \cdot \text{m}^{-3} \cdot \text{h} \cdot \text{n}$ ] | <p><b>Overall Exposition<sub>i,k</sub></b> = max (<math>\text{Exposition}_{i,k} \times \text{Pop}_k</math>)</p> <p>Where<br/> <math>\text{Exposition}_{i,k}</math>: Individual exposition to the <math>i</math>-th pollutant in the <math>k</math>-th cell [<math>\mu\text{g} \cdot \text{m}^{-3} \cdot \text{h}</math>]<br/> <math>\text{Pop}_k</math>: population residential in the <math>k</math>-th cell of the study area [n.]</p>                                                                                                                                                                                                                                                                                                                                                                                                                          | Population               | Quantifies the overall exposure of all individuals present in a given cell (Kao and Hsieh, 2006; Langstaff et al., 1967; Tseng and Chang, 2001)                                                                                                                                                                                                  |
| Overall risk to all the pollutants in the $k$ -th cell [ $\mu\text{g} \cdot \text{m}^{-3} \cdot \text{h}$ ]                         | <p><b>Risk<sub>k</sub></b> = max (<math>(\alpha_{a,k} \times \text{Exposition}_{a,k}) + (\alpha_{b,k} \times \text{Exposition}_{b,k}) + (\alpha_{n,k} \times \text{Exposition}_{n,k})</math>)</p> $\alpha_{a \text{ to } n,k} = \frac{C_{a \text{ to } n,k}}{X_{a \text{ to } n}}$ <p>Where<br/> <math>\text{Exposition}_{a \text{ to } n,k}</math>: Exposition to the <math>a</math> to <math>n</math> th pollutant in the <math>k</math>-th cell [<math>\mu\text{g} \cdot \text{m}^{-3} \cdot \text{h}</math>]<br/> <math>C_{a \text{ to } n,k}</math>: Concentration the <math>a</math> to <math>n</math> th pollutant in the <math>k</math>-th cell [<math>\mu\text{g} \cdot \text{m}^{-3}</math>]<br/> <math>X_{a \text{ to } n}</math>: Legal limit of the <math>a</math> to <math>n</math> th pollutant [<math>\mu\text{g} \cdot \text{m}^{-3}</math>]</p> | Population<br>Vegetation | Quantifies the individual risk as the contribution of all the considered pollutants                                                                                                                                                                                                                                                              |
| Correlation between simulated and measured data of the $i$ -th pollutant in the $k$ -th cell                                        | <p><b>Corr<sub>i,k</sub></b> = max (<math>\frac{(C_{o,j} - \bar{C}_{o,j})(C_{p,i} - \bar{C}_{p,i})}{\sigma_o \sigma_p}</math>)</p> <p>Where<br/> <math>C_{o,k}</math>: Concentration of the <math>j</math>-th pollutant measured by the <math>j</math>-th fixed air quality monitoring stations [<math>\mu\text{g} \cdot \text{m}^{-3}</math>]<br/> <math>C_{p,i}</math>: Concentration of the <math>i</math>-th pollutant estimated in the <math>k</math>-th cell of the study area [<math>\mu\text{g} \cdot \text{m}^{-3}</math>]<br/> <math>\sigma</math> = Standard deviations for the measured and estimated concentration values [<math>\mu\text{g} \cdot \text{m}^{-3}</math>]</p>                                                                                                                                                                         | Population               | Identifies areas with a good match between the measured data from fixed air quality monitoring stations and concentration data estimated (Elkamel et al., 2008; Saisana et al., 2001; Sajani et al., 2004)                                                                                                                                       |
| Exceedance the legal limits of the $i$ th pollutant in the $k$ -th cell [n.]                                                        | <p><b>Exd<sub>i,k</sub></b> = max (<math>(C_{i,k} - X_i) \times \delta</math>)</p> <p>Where<br/> <math>C_{i,k}</math>: Concentration of the <math>i</math> th pollutant in the <math>k</math>-th cell [<math>\mu\text{g} \cdot \text{m}^{-3}</math>]<br/> <math>X_i</math>: Legal limit of the <math>i</math> th pollutant [<math>\mu\text{g} \cdot \text{m}^{-3}</math>]<br/> <math>\delta = \begin{cases} 1 &amp; \text{if } (C_{i,k} - X_i) &gt; 0 \\ 0 &amp; \text{if } (C_{i,k} - X_i) &lt; 0 \end{cases}</math></p>                                                                                                                                                                                                                                                                                                                                         | Population<br>Vegetation | Identifies the probability of exceeding the legal limits for a specific pollutant (Elkamel et al., 2008; Lee et al., 1978; Mazzeo and Venegas, 2010; Modak and Lohani, 1985; Negri and Sozzi, 1988; Saisana et al., 2001; Sarigiannis and Saisana, 2008; Trujillo-Ventura and Hugh Ellis, 1991; Tseng and Chang, 2001; Venegas and Mazzeo, 2003) |
| Maximum concentration value of the $i$ th pollutant in the $k$ -th cell [ $\mu\text{g} \cdot \text{m}^{-3}$ ]                       | <p><b>Max<sub>i,k</sub></b> = max (<math>C_{i,k}</math>)</p> <p>Where<br/> <math>C_{i,k}</math>: Concentration of the <math>i</math> th pollutant in the <math>k</math>-th cell [<math>\mu\text{g} \cdot \text{m}^{-3}</math>]</p>                                                                                                                                                                                                                                                                                                                                                                                                                                                                                                                                                                                                                                | Population<br>Vegetation | Identifies the probability of measuring an elevated concentration value for a specific pollutant (Corti and Senatore, 2000; Munshi and Patil, 1982; Tseng and Chang, 2001)                                                                                                                                                                       |

|                                                                                                                                      |                                                                                                                                                                                                                                                                                                                                                                                                                                                                                                                                                                                                                                 |                            |                                                                                                                                                                                             |
|--------------------------------------------------------------------------------------------------------------------------------------|---------------------------------------------------------------------------------------------------------------------------------------------------------------------------------------------------------------------------------------------------------------------------------------------------------------------------------------------------------------------------------------------------------------------------------------------------------------------------------------------------------------------------------------------------------------------------------------------------------------------------------|----------------------------|---------------------------------------------------------------------------------------------------------------------------------------------------------------------------------------------|
| Minimum Index of Agreement (IOA) for the $i$ -th pollutant in the $k$ -th cell                                                       | $IOA_{i,k} = \frac{(Cs_{i,k} - Co_j)^2}{Co_j^2}$ <p>Where<br/> <math>Cs_{i,k}</math>: estimated concentration value in the <math>k</math>-th cell [<math>\mu\text{g} \cdot \text{m}^{-3}</math>]<br/> <math>Co_j</math>: observed value by the <math>j</math>-th air quality monitoring station [<math>\mu\text{g} \cdot \text{m}^{-3}</math>]</p>                                                                                                                                                                                                                                                                              | Population                 | Assess how the values simulated by the model deviate from the values measured by the fixed air monitoring stations                                                                          |
| Minimum Index of Agreement normalize with the Resident Population (IOAP <sub>r</sub> ) for the $i$ -th pollutant in the $k$ -th cell | $IOAP_{r,i,k} = \frac{1}{\left( \frac{(Cs_{i,k} - Co_j)^2}{Co_j^2} \times Pr_i \right)}$ <p>Where<br/> <math>Cs_{i,k}</math>: estimated concentration value in the <math>k</math>-th cell [<math>\mu\text{g} \cdot \text{m}^{-3}</math>]<br/> <math>Co_j</math>: observed value by the <math>j</math>-th air quality monitoring station [<math>\mu\text{g} \cdot \text{m}^{-3}</math>]<br/> <math>Pr_i</math>: relative population for the <math>k</math>-th cell obtained as the ratio between the resident population in the <math>k</math>-th cell and the total population of the study area (Mazzeo and Venegas, 2010)</p> | Population                 | Assess how the values simulated by the model deviate from the values measured by the fixed air monitoring stations, considering also the presence of resident population.                   |
| Maximum concentration gradient for the $i$ -th pollutant in the $k$ -th cell                                                         | $Grad_{i,k} = \max \left( \sum (C_{i,k} - C_{i,k+1}) \right)$ <p>Where<br/> <math>C_{i,j}</math>: Concentration of the <math>i</math>-th pollutant at the <math>k</math>-th cell [<math>\mu\text{g} \cdot \text{m}^{-3}</math>]<br/> <math>C_{i,k+1}</math>: Concentration of the <math>i</math>-th pollutant at the cells near the <math>k</math>-th cell [<math>\mu\text{g} \cdot \text{m}^{-3}</math>]</p>                                                                                                                                                                                                                   | Population                 | Assesses how changing the concentration field at a specific point compared to neighboring points (Kanakoglou et al., 2005; Kumar et al., 2009; Langstaff et al., 1967; Ott and Thorn, 1976) |
| Maximum Air Quality Index in the $k$ -th cell                                                                                        | $AQI = \max (a_{i,k})$ $a_{a \text{ to } n,k} = \frac{C_{a \text{ to } n,k}}{X_{a \text{ to } n}}$ <p>Where<br/> <math>C_{i,k}</math>: Concentration of the <math>i</math>-th pollutant in the <math>k</math>-th cell [<math>\mu\text{g} \cdot \text{m}^{-3}</math>]<br/> <math>X_i</math>: Limit defined by the law for the <math>i</math>-th pollutant [<math>\mu\text{g} \cdot \text{m}^{-3}</math>]</p>                                                                                                                                                                                                                     | Population                 | Assesses the contribution of all the pollutant at the same time (Arpa, 2008; Modak and Lohani, 1985; Ott and Thorn, 1976)                                                                   |
| Minimum concentration difference in the $k$ -th cell                                                                                 | $Diff_{i,k} = \min \left( \sum (C_{i,k} - \bar{C}_i) \right)$ <p>Where<br/> <math>C_{i,j}</math>: Concentration of the <math>i</math>-th pollutant at the <math>k</math>-th cell [<math>\mu\text{g} \cdot \text{m}^{-3}</math>]<br/> <math>\bar{C}_i</math>: mean concentration of the <math>i</math>-th pollutant on the whole study area [<math>\mu\text{g} \cdot \text{m}^{-3}</math>]</p>                                                                                                                                                                                                                                   | Population                 | Assesses how changing the concentration field at a specific point compared to whole study area (Kumar et al., 2009; Trujillo-Ventura and Hugh Ellis, 1991)                                  |
| Maximum pollutant deposition in the $k$ -th cell                                                                                     | $Dep_k = \max (D_k^{SO_x} + D_k^{NO_2} + D_k^{O_3}) \times \delta$ <p>Where<br/> <math>D_k</math> = Wet and dry deposition of <math>SO_x</math>, <math>NO_2</math> and <math>O_3</math> in the <math>k</math>-th cell [<math>\text{cm/s} \cdot \mu\text{g} \cdot \text{m}^{-3}</math>]<br/> <math>\delta = \begin{cases} 1 &amp; \text{if there is vegetation} \\ 0 &amp; \text{if there is not vegetation} \end{cases}</math></p>                                                                                                                                                                                              | Vegetation                 | Assess the total deposition of the selected pollutants (ARPAV, 2006)                                                                                                                        |
| Maximum PM <sub>10</sub> deposition in the $k$ -th cell                                                                              | $Dep_k = \max (D_k^{PM_{10}}) \times \delta$ <p>Where<br/> <math>D_k^{PM_{10}}</math> = Wet and dry deposition of PM<sub>10</sub> in the <math>k</math>-th cell [<math>\text{cm/s} \cdot \mu\text{g} \cdot \text{m}^{-3}</math>]<br/> <math>\delta = \begin{cases} 1 &amp; \text{if there is vegetation} \\ 0 &amp; \text{if there is not vegetation} \end{cases}</math></p>                                                                                                                                                                                                                                                    | Vegetation                 | Assess the total deposition of the selected pollutants (ARPAV, 2006)                                                                                                                        |
| Maximum damage index in the $k$ -th cell                                                                                             | $Damage_k = \max (Erosion_k + 2.5 \text{ blackening}_k) \times \delta$ $Erosion_k = [\alpha_1 R + \alpha_2 RH^+ + \alpha_3 R \delta_j^C + \alpha_4 (D_k^{SO_2} + D_k^{HNO_3} + D_k^{PM_{10}})] \times \delta^{ARC}$ $Blackening_k = CPTS_k$ <p>Where<br/> <math>\alpha_1, \alpha_2, \alpha_3, \alpha_4 = 18.8, 0.016, 1.88, 0.0018</math></p>                                                                                                                                                                                                                                                                                   | Physical cultural heritage | Assess the total damage due to erosion blackening pollutants (ARPAV, 2006; ISPRA, 2011; Lipfert, 1989)                                                                                      |

|  |                                                                                                                                                                                                                                                                                                                                                                                                                                                                                                                                                                                                                                                                                                                                                                                                                                                                                                                                                                                                                          |  |  |
|--|--------------------------------------------------------------------------------------------------------------------------------------------------------------------------------------------------------------------------------------------------------------------------------------------------------------------------------------------------------------------------------------------------------------------------------------------------------------------------------------------------------------------------------------------------------------------------------------------------------------------------------------------------------------------------------------------------------------------------------------------------------------------------------------------------------------------------------------------------------------------------------------------------------------------------------------------------------------------------------------------------------------------------|--|--|
|  | <p> <math>R</math> = precipitations [mm of rain]<br/> <math>H^+</math> = Hydrogen ion concentration in the rain [<math>\mu\text{g} \cdot \text{m}^{-3}</math>]<br/> <math>D_k^{\text{SO}_2}</math>, <math>D_k^{\text{HNO}_3}</math>, <math>D_k^{\text{PM}_{10}}</math> = Total deposition of <math>\text{SO}_2</math>, <math>\text{HNO}_3</math> and <math>\text{PM}_{10}</math> in the <math>k</math>-th cell [<math>\text{cm/s} \times \mu\text{g} \cdot \text{m}^{-3}</math>]<br/> <math>\text{CPTS}_k</math> = Concentration of total suspended particulate in the <math>k</math>-th cell [<math>\mu\text{g} \cdot \text{m}^{-3}</math>]<br/><br/> <math>\delta^C \begin{cases} 1 \text{ if the } k - \text{th cell is near the coast (within 5 km)} \\ 0 \text{ if the } k - \text{th cell is not near the coast (within 5 km)} \end{cases}</math><br/><br/> <math>\delta^{\text{ARC}} \begin{cases} 1 \text{ if there is cultural heritage} \\ 0 \text{ if there is not cultural heritage} \end{cases}</math> </p> |  |  |
|--|--------------------------------------------------------------------------------------------------------------------------------------------------------------------------------------------------------------------------------------------------------------------------------------------------------------------------------------------------------------------------------------------------------------------------------------------------------------------------------------------------------------------------------------------------------------------------------------------------------------------------------------------------------------------------------------------------------------------------------------------------------------------------------------------------------------------------------------------------------------------------------------------------------------------------------------------------------------------------------------------------------------------------|--|--|
